# Supplementary material for: Comparative Life Cycle Assessment of Cellulose Nanofibres Production Routes from Virgin and Recycled Raw Materials
Source: MDPI journal article supplement (doi:10.3390/molecules26092558), 2021-04-28
Supplement: s1 [file s1]

## Supplementary Materials for

# “Comparative Life Cycle Assessment of Cellulose Nanofibres Production Routes from Virgin and Recycled Raw Materials”

**Table S1.** Normalization and weighting factors to be used with EF 3.0 impact assessment method [1].

| Impact category                   | Normalization | Weighting |
|-----------------------------------|---------------|-----------|
| Climate change                    | 0.0001235     | 0.2106    |
| Ozone depletion                   | 18.64         | 0.0631    |
| Ionising radiation                | 0.000237      | 0.0501    |
| Photochemical ozone formation     | 0.02463       | 0.0478    |
| Particulate matter                | 1680          | 0.0896    |
| Human toxicity, non-cancer        | 4354          | 0.0184    |
| Human toxicity, cancer            | 59173         | 0.0213    |
| Acidification                     | 0.018         | 0.062     |
| Eutrophication, freshwater        | 0.6223        | 0.028     |
| Eutrophication, marine            | 0.05116       | 0.0296    |
| Eutrophication, terrestrial       | 0.005658      | 0.0371    |
| Ecotoxicity, freshwater           | 0.00002343    | 0.0192    |
| Land use                          | 0.00000122    | 0.0794    |
| Water use                         | 0.00008719    | 0.0851    |
| Resource use, fossils             | 0.00001538    | 0.0832    |
| Resource use, minerals and metals | 15.71         | 0.0755    |

**Table S2.** Life cycle impact assessment of the six CNFs produced at the lab scale; results are given per FU and refers to the normalization stage (pure quantities).

| Impact Category                   | Unit | Enzymatic treatments & Homogenization (ENZHO) |                                                 | TEMPO–Oxidation & Homogenization (TOHO) |                                                 | TEMPO–Oxidation & Ultrasonication (TOSO) |                                                 |
|-----------------------------------|------|-----------------------------------------------|-------------------------------------------------|-----------------------------------------|-------------------------------------------------|------------------------------------------|-------------------------------------------------|
|                                   |      | Virgin fibres<br>(hardwood kraft pulp)        | Recycled materials<br>(industrial waste sludge) | Virgin fibres<br>(Cotton linters)       | Recycled materials<br>(industrial waste sludge) | Virgin fibres<br>(Cotton linters)        | Recycled materials<br>(industrial waste sludge) |
| Climate change                    | –    | 2.29 <sup>-5</sup>                            | 2.19×10 <sup>-5</sup>                           | 7.81×10 <sup>-5</sup>                   | 8.37×10 <sup>-5</sup>                           | 1.09×10 <sup>-4</sup>                    | 9.68×10 <sup>-5</sup>                           |
| Ozone depletion                   | –    | 4.74×10 <sup>-7</sup>                         | 4.48×10 <sup>-7</sup>                           | 1.53×10 <sup>-6</sup>                   | 1.72×10 <sup>-6</sup>                           | 2.16×10 <sup>-6</sup>                    | 2.00×10 <sup>-6</sup>                           |
| Ionising radiation                | –    | 5.48×10 <sup>-6</sup>                         | 5.19×10 <sup>-6</sup>                           | 1.72×10 <sup>-5</sup>                   | 1.96×10 <sup>-5</sup>                           | 2.41×10 <sup>-5</sup>                    | 2.26×10 <sup>-5</sup>                           |
| Photochemical ozone formation     | –    | 1.11×10 <sup>-5</sup>                         | 1.00×10 <sup>-5</sup>                           | 3.83×10 <sup>-5</sup>                   | 3.84×10 <sup>-5</sup>                           | 5.28×10 <sup>-5</sup>                    | 4.43×10 <sup>-5</sup>                           |
| Particulate matter                | –    | 8.61×10 <sup>-6</sup>                         | 6.49×10 <sup>-6</sup>                           | 3.21×10 <sup>-5</sup>                   | 2.46×10 <sup>-5</sup>                           | 4.29×10 <sup>-5</sup>                    | 2.83×10 <sup>-5</sup>                           |
| Human toxicity, non-cancer        | –    | 8.42×10 <sup>-6</sup>                         | 7.79×10 <sup>-6</sup>                           | 2.97×10 <sup>-5</sup>                   | 2.90×10 <sup>-5</sup>                           | 4.50×10 <sup>-5</sup>                    | 3.30×10 <sup>-5</sup>                           |
| Human toxicity, cancer            | –    | 4.33×10 <sup>-6</sup>                         | 3.79×10 <sup>-6</sup>                           | 2.35×10 <sup>-5</sup>                   | 1.45×10 <sup>-5</sup>                           | 3.04×10 <sup>-5</sup>                    | 1.64×10 <sup>-5</sup>                           |
| Acidification                     | –    | 1.83×10 <sup>-5</sup>                         | 1.72×10 <sup>-5</sup>                           | 7.43×10 <sup>-5</sup>                   | 6.57×10 <sup>-5</sup>                           | 1.01×10 <sup>-4</sup>                    | 7.59×10 <sup>-5</sup>                           |
| Eutrophication, freshwater        | –    | 3.37×10 <sup>-5</sup>                         | 3.19×10 <sup>-5</sup>                           | 1.31×10 <sup>-4</sup>                   | 1.21×10 <sup>-4</sup>                           | 1.78×10 <sup>-4</sup>                    | 1.39×10 <sup>-4</sup>                           |
| Eutrophication, marine            | –    | 8.13×10 <sup>-6</sup>                         | 7.28×10 <sup>-6</sup>                           | 1.08×10 <sup>-4</sup>                   | 2.86×10 <sup>-5</sup>                           | 1.36×10 <sup>-4</sup>                    | 3.31×10 <sup>-5</sup>                           |
| Eutrophication, terrestrial       | –    | 1.10×10 <sup>-5</sup>                         | 9.99×10 <sup>-6</sup>                           | 5.66×10 <sup>-5</sup>                   | 3.82×10 <sup>-5</sup>                           | 7.51×10 <sup>-5</sup>                    | 4.42×10 <sup>-5</sup>                           |
| Ecotoxicity, freshwater           | –    | 1.03×10 <sup>-4</sup>                         | 9.35×10 <sup>-5</sup>                           | 3.15×10 <sup>-4</sup>                   | 2.64×10 <sup>-4</sup>                           | 4.16×10 <sup>-4</sup>                    | 3.07×10 <sup>-4</sup>                           |
| Land use                          | –    | 4.29×10 <sup>-6</sup>                         | 1.25×10 <sup>-6</sup>                           | 9.56×10 <sup>-6</sup>                   | 6.64×10 <sup>-6</sup>                           | 1.24×10 <sup>-5</sup>                    | 7.74×10 <sup>-6</sup>                           |
| Water use                         | –    | 3.39×10 <sup>-5</sup>                         | 3.18×10 <sup>-5</sup>                           | 1.89×10 <sup>-4</sup>                   | 6.74×10 <sup>-5</sup>                           | 2.04×10 <sup>-4</sup>                    | 4.67×10 <sup>-5</sup>                           |
| Resource use, fossils             | –    | 4.16×10 <sup>-5</sup>                         | 3.96×10 <sup>-5</sup>                           | 1.36×10 <sup>-4</sup>                   | 1.52×10 <sup>-4</sup>                           | 1.90×10 <sup>-4</sup>                    | 1.75×10 <sup>-4</sup>                           |
| Resource use, minerals and metals | –    | 2.47×10 <sup>-5</sup>                         | 2.23×10 <sup>-5</sup>                           | 8.42×10 <sup>-5</sup>                   | 8.47×10 <sup>-5</sup>                           | 1.16×10 <sup>-4</sup>                    | 9.73×10 <sup>-5</sup>                           |

**Table S3.** Life cycle impact assessment of the six CNFs produced at the lab scale; results are given per FU and refers to the single score stage in arbitrary eco-points (Pt)  $\times 10^{-6}$ .

| Impact Category                   | Unit | Enzymatic treatments & Homogenization (ENZHO) |                                              | TEMPO-Oxidation & Homogenization (TOHO) |                                              | TEMPO-Oxidation & Ultrasonication (TOSO) |                                              |
|-----------------------------------|------|-----------------------------------------------|----------------------------------------------|-----------------------------------------|----------------------------------------------|------------------------------------------|----------------------------------------------|
|                                   |      | Virgin fibres (hardwood kraft pulp)           | Recycled materials (industrial waste sludge) | Virgin fibres (Cotton linters)          | Recycled materials (industrial waste sludge) | Virgin fibres (Cotton linters)           | Recycled materials (industrial waste sludge) |
| Total                             | μPt  | 1.99 $\times 10^{+1}$                         | 1.83 $\times 10^{+1}$                        | 7.73 $\times 10^{+1}$                   | 6.37 $\times 10^{+1}$                        | 1.01 $\times 10^{+2}$                    | 7.09 $\times 10^{+1}$                        |
| Climate change                    | μPt  | 4.83 $\times 10$                              | 4.61 $\times 10$                             | 1.64 $\times 10^{+1}$                   | 1.76 $\times 10^{+1}$                        | 2.29 $\times 10^{+1}$                    | 2.04 $\times 10^{+1}$                        |
| Ozone depletion                   | μPt  | 2.99 $\times 10^{-2}$                         | 2.83 $\times 10^{-2}$                        | 9.66 $\times 10^{-2}$                   | 1.09 $\times 10^{-1}$                        | 1.36 $\times 10^{-1}$                    | 1.26 $\times 10^{-1}$                        |
| Ionising radiation                | μPt  | 2.75 $\times 10^{-1}$                         | 2.60 $\times 10^{-1}$                        | 8.64 $\times 10^{-1}$                   | 9.84 $\times 10^{-1}$                        | 1.21 $\times 10$                         | 1.13 $\times 10$                             |
| Photochemical ozone formation     | μPt  | 5.33 $\times 10^{-1}$                         | 4.80 $\times 10^{-1}$                        | 1.83 $\times 10$                        | 1.83 $\times 10$                             | 2.53 $\times 10$                         | 2.12 $\times 10$                             |
| Particulate matter                | μPt  | 7.72 $\times 10^{-1}$                         | 5.81 $\times 10^{-1}$                        | 2.88 $\times 10$                        | 2.20 $\times 10$                             | 3.85 $\times 10$                         | 2.54 $\times 10$                             |
| Human toxicity, non-cancer        | μPt  | 1.55 $\times 10^{-1}$                         | 1.43 $\times 10^{-1}$                        | 5.46 $\times 10^{-1}$                   | 5.34 $\times 10^{-1}$                        | 7.46 $\times 10^{-1}$                    | 6.07 $\times 10^{-1}$                        |
| Human toxicity, cancer            | μPt  | 9.22 $\times 10^{-2}$                         | 8.07 $\times 10^{-2}$                        | 5.01 $\times 10^{-1}$                   | 3.09 $\times 10^{-1}$                        | 6.47 $\times 10^{-1}$                    | 3.50 $\times 10^{-1}$                        |
| Acidification                     | μPt  | 1.14 $\times 10$                              | 1.07 $\times 10$                             | 4.61 $\times 10$                        | 4.07 $\times 10$                             | 6.27 $\times 10$                         | 4.71 $\times 10$                             |
| Eutrophication, freshwater        | μPt  | 9.45 $\times 10^{-1}$                         | 8.92 $\times 10^{-1}$                        | 3.67 $\times 10$                        | 3.39 $\times 10$                             | 4.99 $\times 10$                         | 3.90 $\times 10$                             |
| Eutrophication, marine            | μPt  | 2.41 $\times 10^{-1}$                         | 2.15 $\times 10^{-1}$                        | 3.20 $\times 10$                        | 8.46 $\times 10^{-1}$                        | 4.01 $\times 10$                         | 9.80 $\times 10^{-1}$                        |
| Eutrophication, terrestrial       | μPt  | 4.07 $\times 10^{-1}$                         | 3.71 $\times 10^{-1}$                        | 2.10 $\times 10$                        | 1.42 $\times 10$                             | 2.79 $\times 10$                         | 1.64 $\times 10$                             |
| Ecotoxicity, freshwater           | μPt  | 1.98 $\times 10$                              | 1.79 $\times 10$                             | 6.05 $\times 10$                        | 5.06 $\times 10$                             | 8.00 $\times 10$                         | 5.89 $\times 10$                             |
| Land use                          | μPt  | 3.41 $\times 10^{-1}$                         | 9.95 $\times 10^{-2}$                        | 7.59 $\times 10^{-1}$                   | 5.27 $\times 10^{-1}$                        | 9.85 $\times 10^{-1}$                    | 6.14 $\times 10^{-1}$                        |
| Water use                         | μPt  | 2.88 $\times 10$                              | 2.71 $\times 10$                             | 1.61 $\times 10^{+1}$                   | 5.74 $\times 10$                             | 1.73 $\times 10^{+1}$                    | 3.98 $\times 10$                             |
| Resource use, fossils             | μPt  | 3.46 $\times 10$                              | 3.30 $\times 10$                             | 1.13 $\times 10^{+1}$                   | 1.26 $\times 10^{+1}$                        | 1.58 $\times 10^{+1}$                    | 1.46 $\times 10^{+1}$                        |
| Resource use, minerals and metals | μPt  | 1.87 $\times 10$                              | 1.69 $\times 10$                             | 6.36 $\times 10$                        | 6.40 $\times 10$                             | 8.74 $\times 10$                         | 7.35 $\times 10$                             |

**Table S4.** Life cycle impact assessment of the six CNFs produced at the lab scale; results are given per FU and refers to the characterization stage; scenario (2): reduction of electricity consumption by 50% with respect to base scenario (1).

| Impact Category                   | Unit         | Enzymatic treatments & Homogenization (ENZHO) |                                              | TEMPO–Oxidation & Homogenization (TOHO) |                                              | TEMPO–Oxidation & Ultrasonication (TOSO) |                                              |
|-----------------------------------|--------------|-----------------------------------------------|----------------------------------------------|-----------------------------------------|----------------------------------------------|------------------------------------------|----------------------------------------------|
|                                   |              | Virgin fibres (hardwood kraft pulp)           | Recycled materials (industrial waste sludge) | Virgin fibres (Cotton linters)          | Recycled materials (industrial waste sludge) | Virgin fibres (Cotton linters)           | Recycled materials (industrial waste sludge) |
| Climate change                    | kg CO2 eq    | 9.65×10 <sup>-2</sup>                         | 9.00×10 <sup>-2</sup>                        | 3.44×10 <sup>-1</sup>                   | 3.44×10 <sup>-1</sup>                        | 4.74×10 <sup>-1</sup>                    | 8.24×10 <sup>-1</sup>                        |
| Ozone depletion                   | kg CFC11 eq  | 1.33×10 <sup>-8</sup>                         | 1.23×10 <sup>-8</sup>                        | 4.32×10 <sup>-8</sup>                   | 4.74×10 <sup>-8</sup>                        | 6.11×10 <sup>-8</sup>                    | 1.14×10 <sup>-7</sup>                        |
| Ionising radiation                | kBq U-235 eq | 1.23×10 <sup>-2</sup>                         | 1.13×10 <sup>-2</sup>                        | 3.79×10 <sup>-2</sup>                   | 4.24×10 <sup>-2</sup>                        | 5.23×10 <sup>-2</sup>                    | 1.00×10 <sup>-1</sup>                        |
| Photochemical ozone formation     | kg NMVOC eq  | 2.49×10 <sup>-4</sup>                         | 2.09×10 <sup>-4</sup>                        | 8.98×10 <sup>-4</sup>                   | 7.96×10 <sup>-4</sup>                        | 1.22×10 <sup>-3</sup>                    | 1.90×10 <sup>-3</sup>                        |
| Particulate matter                | disease inc. | 3.24×10 <sup>-9</sup>                         | 2.02×10 <sup>-9</sup>                        | 1.30×10 <sup>-8</sup>                   | 7.59×10 <sup>-9</sup>                        | 1.70×10 <sup>-8</sup>                    | 1.80×10 <sup>-8</sup>                        |
| Human toxicity, non-cancer        | CTUh         | 1.11×10 <sup>-9</sup>                         | 9.86×10 <sup>-10</sup>                       | 4.17×10 <sup>-9</sup>                   | 3.59×10 <sup>-9</sup>                        | 5.57×10 <sup>-9</sup>                    | 8.43×10 <sup>-9</sup>                        |
| Human toxicity, cancer            | CTUh         | 4.41×10 <sup>-11</sup>                        | 3.56×10 <sup>-11</sup>                       | 3.04×10 <sup>-10</sup>                  | 1.37×10 <sup>-10</sup>                       | 3.81×10 <sup>-10</sup>                   | 3.07×10 <sup>-10</sup>                       |
| Acidification                     | mol H+ eq    | 5.39×10 <sup>-4</sup>                         | 4.87×10 <sup>-4</sup>                        | 2.58×10 <sup>-3</sup>                   | 1.85×10 <sup>-3</sup>                        | 3.44×10 <sup>-3</sup>                    | 4.44×10 <sup>-3</sup>                        |
| Eutrophication, freshwater        | kg P eq      | 2.91×10 <sup>-5</sup>                         | 2.66×10 <sup>-5</sup>                        | 1.29×10 <sup>-4</sup>                   | 1.00×10 <sup>-4</sup>                        | 1.72×10 <sup>-4</sup>                    | 2.37×10 <sup>-4</sup>                        |
| Eutrophication, marine            | kg N eq      | 9.21×10 <sup>-5</sup>                         | 7.71×10 <sup>-5</sup>                        | 1.90×10 <sup>-3</sup>                   | 3.09×10 <sup>-4</sup>                        | 2.35×10 <sup>-3</sup>                    | 7.24×10 <sup>-4</sup>                        |
| Eutrophication, terrestrial       | mol N eq     | 1.05×10 <sup>-3</sup>                         | 9.00×10 <sup>-4</sup>                        | 7.15×10 <sup>-3</sup>                   | 3.44×10 <sup>-3</sup>                        | 9.24×10 <sup>-3</sup>                    | 8.23×10 <sup>-3</sup>                        |
| Ecotoxicity, freshwater           | CTUe         | 3.25×10                                       | 2.87×10                                      | 9.74×10                                 | 6.96×10                                      | 1.26×10 <sup>+1</sup>                    | 1.53×10 <sup>+1</sup>                        |
| Land use                          | Pt           | 3.00×10                                       | 5.23×10 <sup>-1</sup>                        | 6.17×10                                 | 3.51×10                                      | 7.82×10                                  | 7.96×10                                      |
| Water use                         | m3 depriv.   | 3.37×10 <sup>-1</sup>                         | 3.15×10 <sup>-1</sup>                        | 2.00×10                                 | 5.81×10 <sup>-1</sup>                        | 2.10×10                                  | 5.66×10 <sup>-1</sup>                        |
| Resource use, fossils             | MJ           | 1.41×10                                       | 1.31×10                                      | 4.66×10                                 | 5.01×10                                      | 6.46×10                                  | 1.20×10 <sup>+1</sup>                        |
| Resource use, minerals and metals | kg Sb eq     | 8.85×10 <sup>-7</sup>                         | 7.50×10 <sup>-7</sup>                        | 3.14×10 <sup>-6</sup>                   | 2.82×10 <sup>-6</sup>                        | 4.24×10 <sup>-6</sup>                    | 6.64×10 <sup>-6</sup>                        |

**Table S5.** Life cycle impact assessment of the six CNFs produced at the lab scale; results are given per FU and refers to the characterization stage; scenario (3): reduction of electricity consumption by 75% with respect to base scenario (1).

| Impact Category                   | Unit         | Enzymatic treatments & Homogenization (ENZHO) |                                              | TEMPO–Oxidation & Homogenization (TOHO) |                                              | TEMPO–Oxidation & Ultrasonication (TOSO) |                                              |
|-----------------------------------|--------------|-----------------------------------------------|----------------------------------------------|-----------------------------------------|----------------------------------------------|------------------------------------------|----------------------------------------------|
|                                   |              | Virgin fibres (hardwood kraft pulp)           | Recycled materials (industrial waste sludge) | Virgin fibres (Cotton linters)          | Recycled materials (industrial waste sludge) | Virgin fibres (Cotton linters)           | Recycled materials (industrial waste sludge) |
| Climate change                    | kg CO2 eq    | $5.18 \times 10^{-2}$                         | $4.64 \times 10^{-2}$                        | $2.01 \times 10^{-1}$                   | $1.77 \times 10^{-1}$                        | $2.71 \times 10^{-1}$                    | $2.03 \times 10^{-1}$                        |
| Ozone depletion                   | kg CFC11 eq  | $7.32 \times 10^{-9}$                         | $6.38 \times 10^{-9}$                        | $2.38 \times 10^{-8}$                   | $2.48 \times 10^{-8}$                        | $3.37 \times 10^{-8}$                    | $2.91 \times 10^{-8}$                        |
| Ionising radiation                | kBq U-235 eq | $6.90 \times 10^{-3}$                         | $6.05 \times 10^{-3}$                        | $2.05 \times 10^{-2}$                   | $2.21 \times 10^{-2}$                        | $2.76 \times 10^{-2}$                    | $2.48 \times 10^{-2}$                        |
| Photochemical ozone formation     | kg NMVOC eq  | $1.47 \times 10^{-4}$                         | $1.09 \times 10^{-4}$                        | $5.70 \times 10^{-4}$                   | $4.15 \times 10^{-4}$                        | $7.53 \times 10^{-4}$                    | $4.75 \times 10^{-4}$                        |
| Particulate matter                | disease inc. | $2.30 \times 10^{-9}$                         | $1.10 \times 10^{-9}$                        | $1.00 \times 10^{-8}$                   | $4.06 \times 10^{-9}$                        | $1.27 \times 10^{-8}$                    | $4.61 \times 10^{-9}$                        |
| Human toxicity, non-cancer        | CTUh         | $7.00 \times 10^{-10}$                        | $5.84 \times 10^{-10}$                       | $2.84 \times 10^{-9}$                   | $2.05 \times 10^{-9}$                        | $3.70 \times 10^{-9}$                    | $2.23 \times 10^{-9}$                        |
| Human toxicity, cancer            | CTUh         | $2.95 \times 10^{-11}$                        | $2.14 \times 10^{-11}$                       | $2.57 \times 10^{-10}$                  | $8.22 \times 10^{-11}$                       | $3.15 \times 10^{-10}$                   | $8.84 \times 10^{-11}$                       |
| Acidification                     | mol H+ eq    | $2.99 \times 10^{-4}$                         | $2.53 \times 10^{-4}$                        | $1.81 \times 10^{-3}$                   | $9.58 \times 10^{-4}$                        | $2.34 \times 10^{-3}$                    | $1.10 \times 10^{-3}$                        |
| Eutrophication, freshwater        | kg P eq      | $1.65 \times 10^{-5}$                         | $1.44 \times 10^{-5}$                        | $8.88 \times 10^{-5}$                   | $5.32 \times 10^{-5}$                        | $1.15 \times 10^{-4}$                    | $6.01 \times 10^{-5}$                        |
| Eutrophication, marine            | kg N eq      | $5.87 \times 10^{-5}$                         | $4.45 \times 10^{-5}$                        | $1.79 \times 10^{-3}$                   | $1.84 \times 10^{-4}$                        | $2.19 \times 10^{-3}$                    | $2.13 \times 10^{-4}$                        |
| Eutrophication, terrestrial       | mol N eq     | $6.06 \times 10^{-4}$                         | $4.68 \times 10^{-4}$                        | $5.72 \times 10^{-3}$                   | $1.78 \times 10^{-3}$                        | $7.22 \times 10^{-3}$                    | $2.04 \times 10^{-3}$                        |
| Ecotoxicity, freshwater           | CTUe         | $2.68 \times 10$                              | $2.31 \times 10$                             | $7.89 \times 10$                        | $4.81 \times 10$                             | $9.94 \times 10$                         | $5.63 \times 10$                             |
| Land use                          | Pt           | $2.74 \times 10$                              | $2.71 \times 10^{-1}$                        | $5.34 \times 10$                        | $2.54 \times 10$                             | $6.64 \times 10$                         | $2.98 \times 10$                             |
| Water use                         | m3 depriv.   | $3.11 \times 10^{-1}$                         | $2.89 \times 10^{-1}$                        | $1.92 \times 10$                        | $4.84 \times 10^{-1}$                        | $1.98 \times 10$                         | $2.02 \times 10^{-1}$                        |
| Resource use, fossils             | MJ           | $7.60 \times 10^{-1}$                         | $6.78 \times 10^{-1}$                        | $2.57 \times 10$                        | $2.59 \times 10$                             | $3.51 \times 10$                         | $2.96 \times 10$                             |
| Resource use, minerals and metals | kg Sb eq     | $5.41 \times 10^{-7}$                         | $4.15 \times 10^{-7}$                        | $2.04 \times 10^{-6}$                   | $1.53 \times 10^{-6}$                        | $2.67 \times 10^{-6}$                    | $1.72 \times 10^{-6}$                        |

## References

1. Fazio, S.; Castellani, V.; Sala, S.; Schau, E.M.; Secchi, M.; Zampori, L.; Diaconu, E. *Supporting information to the characterisation factors of recommended EF Life Cycle Impact Assessment methods*; 2018; ISBN 9789279767425.
